# Supplementary material
Source: HighWire-hosted journal article supplement (https://bjsm.bmj.com/content/58/3/144)
Supplement: inline-supplementary-material-1 [file inline-supplementary-material-1.pdf]

SUPPLEMENTARY FILE 1

Search Strategy

| Supplementary table PubMed search strategy |                                        |                                                                                                                                                                                                                                                                                     |  |
|--------------------------------------------|----------------------------------------|-------------------------------------------------------------------------------------------------------------------------------------------------------------------------------------------------------------------------------------------------------------------------------------|--|
| #1                                         | Problem text word search 1             | Injur* OR Pain* OR Tear* OR Strain* OR Sprain* OR Concus* OR Dislocation* OR Upper Limb OR Lower Limb OR Extremity OR Head OR Knee OR Ankle OR Shoulder OR Thigh OR Hamstring OR Foot OR ACL OR Cruciate OR Epidemiolog* OR Fracture* OR Damage OR Neuromuscular OR Musculoskeletal |  |
| #2                                         | Problem controlled vocab search 1      | "Athletic Injuries/prevention and control"[Mesh] OR<br>"Musculoskeletal System"[Mesh] OR<br>"Trauma, Nervous System/prevention and control"[Mesh]                                                                                                                                   |  |
| #1 OR #2                                   | Bundle problem                         |                                                                                                                                                                                                                                                                                     |  |
| #3                                         |                                        |                                                                                                                                                                                                                                                                                     |  |
| #4                                         | Intervention text word search 1        | Coach* OR trainer* OR “delivery agent*”                                                                                                                                                                                                                                             |  |
| #5                                         | Intervention text word search 2        | Workshop OR education OR “train the trainer” OR training OR upskill* OR instruct*                                                                                                                                                                                                   |  |
| #6                                         | Intervention controlled vocab search 2 | “education” [mesh]                                                                                                                                                                                                                                                                  |  |
| #5 OR #6                                   | Bundle intervention 2                  |                                                                                                                                                                                                                                                                                     |  |
| #7                                         |                                        |                                                                                                                                                                                                                                                                                     |  |
| #8                                         | Intervention text word search 3        | “Behaviour change” OR intention* OR “knowledge translation” OR implementation OR adoption OR belief* OR behav* OR influenc*                                                                                                                                                         |  |
| #9                                         | Intervention controlled vocab search 3 | "Implementation Science"[Mesh]                                                                                                                                                                                                                                                      |  |
| #8 OR #9                                   | Bundle intervention 3                  |                                                                                                                                                                                                                                                                                     |  |
| #10                                        |                                        |                                                                                                                                                                                                                                                                                     |  |

|                           |                                        |                                                                                                                                                                                                                              |
|---------------------------|----------------------------------------|------------------------------------------------------------------------------------------------------------------------------------------------------------------------------------------------------------------------------|
| #11                       | Intervention text word search 4        | Prevent* OR Reduc* OR Decreas* OR Increas* OR High OR Intervent* OR Change OR Changing OR Risk OR Factor* OR strength OR Control OR Train* OR Exercise OR Warm OR “injury prevention” OR “neuromuscular training” OR program |
| #12                       | Intervention controlled vocab search 4 | "Warm-Up Exercise"[Mesh] OR<br>"Athletic Injuries/prevention and control"[Mesh]<br>OR<br>“Accident Prevention”[Mesh]                                                                                                         |
| #11 OR #12                | Bundle intervention 4                  |                                                                                                                                                                                                                              |
| #13                       |                                        |                                                                                                                                                                                                                              |
| #4 AND #7 AND #10 AND #13 | Bundle intervention 1+2+3+4            |                                                                                                                                                                                                                              |
| #14                       |                                        |                                                                                                                                                                                                                              |
| #4 AND #7 AND #13         | Bundle without behaviour change string |                                                                                                                                                                                                                              |
| #15                       |                                        |                                                                                                                                                                                                                              |
| #16                       | Patient text word search 1             | Youth OR young OR school OR adolescen* OR teenage*                                                                                                                                                                           |
| #17                       | Patient controlled vocab search 1      | "Adolescent"[Mesh] OR<br>"Schools"[Mesh]                                                                                                                                                                                     |
| #16 OR #17                | Bundle 1                               |                                                                                                                                                                                                                              |
| #18                       |                                        |                                                                                                                                                                                                                              |
| #19                       | Patient text word search 2             | Sport* OR “field sport*” OR “team sport*” OR soccer OR football OR rugby OR “field hockey” OR “gaelic games” OR hurling OR camogie OR “gaelic football”                                                                      |

|                    |                                                    |                                                                                                                      |
|--------------------|----------------------------------------------------|----------------------------------------------------------------------------------------------------------------------|
| #20                | Patient controlled vocab search 2                  | "Team Sports"[Mesh] OR "Youth Sports"[Mesh] OR "Football"[Mesh] OR "Soccer"[Mesh] OR "Rugby"[Mesh] OR "Hockey"[Mesh] |
| #19 OR #20         | Bundle 2                                           |                                                                                                                      |
| #21                |                                                    |                                                                                                                      |
| #18 AND #21        | Bundle patient                                     |                                                                                                                      |
| #22                |                                                    |                                                                                                                      |
| #3 AND #14         | Overlap (problem + intervention)                   |                                                                                                                      |
| #23                |                                                    |                                                                                                                      |
| #3 AND #15         | Overlap (problem + intervention without behaviour) |                                                                                                                      |
| #24                |                                                    |                                                                                                                      |
| #3 AND #22         | Overlap (problem + patient)                        |                                                                                                                      |
| #25                |                                                    |                                                                                                                      |
| #22 AND #14        | Overlap (patient + intervention)                   |                                                                                                                      |
| #26                |                                                    |                                                                                                                      |
| #22 AND #15        | Overlap (patient + intervention) without behaviour |                                                                                                                      |
| #27                |                                                    |                                                                                                                      |
| #3 AND #14 AND #22 | Overlap (problem + intervention + patient)         |                                                                                                                      |
| #28                |                                                    |                                                                                                                      |

|     |     |              |   |
|-----|-----|--------------|---|
| #3  | AND | Overlap      |   |
| #15 | AND | (problem     | + |
| #22 |     | intervention | + |
|     |     | patient)     | – |
|     |     | without      |   |
| #29 |     | behaviour    |   |
|     |     | string       |   |

---
